# 1 Computer Simulations of the Humoral Immune System Reveal 2 How Imprinting Can Affect Responses to Influenza HA Stalk with 3 Implications for the Design of Universal Vaccines

4 Christopher S. Anderson<sup>1</sup>, Mark Y. Sangster<sup>1</sup>, Hongmei Yang<sup>2</sup>, Sidhartha Chaudhury<sup>3</sup>, David J.  
5 Topham<sup>1\*</sup>

6 <sup>1</sup>New York Influenza Center of Excellence at David Smith Center for Immunology and Vaccine  
7 Biology, Department of Microbiology and Immunology, University of Rochester School of  
8 Medicine and Dentistry, Rochester, NY. <sup>2</sup>Department of Biostatistics and Computational Biology,  
9 University of Rochester Medical Center, Rochester, NY. <sup>3</sup>BHSAI/U.S. Army MPMC, Frederick,  
10 MD.

11 \*Corresponding author. E-mail: [David\\_Topham@URMC.rochester.edu](mailto:David_Topham@URMC.rochester.edu)

12

## 13 Abstract

14 Antigenic drift of the H1N1 virus results in significant reduction in vaccine efficacy  
15 and often necessitates the production of new vaccines that more closely antigenically  
16 match the circulating strains. Efforts to develop a vaccine resistant to antigenic drift are  
17 ongoing and the HA stalk region of the influenza H1N1 virus has emerged as a potential  
18 target for vaccines due to its conservation across antigenically drifted strains. Studies of  
19 the 2009 pandemic H1N1 vaccine as well as candidate pandemic avian influenza  
20 vaccines have demonstrated that it is possible to boost antibody towards the stalk  
21 region, but for reason that are unclear, only in individuals who had not been exposed to  
22 antigenically similar viruses. Here we use stochastic simulations of a humoral immune  
23 system model to provide theoretical insights into how repeated exposure to influenza  
24 vaccines increases stalk-specific antibodies. We found that pre-existing memory B cells  
25 are the greatest contributor to stalk-specific antibody boosting and that pre-existing  
26 antibody negatively interferes with this boosting. Additionally, we found that increases in  
27 cross-reactivity after heterologous boosting occur in both head and stalk specific  
28 antibody populations. Moreover, pre-existing memory B cells focus antibody responses

29 towards the stalk region in a manner dependent on the antigenic dissimilarities between  
30 other antigenic sites, even when these dissimilarities are minimal. Finally we show stalk-  
31 specific antibody can be boosted by repeat exposure to homologous antigen, but this  
32 boosting is limited. These finding provide needed insights into universal vaccine  
33 regimens, especially those aimed at boosting stalk-specific antibody responses using  
34 prime and boost strategies.

## 35 **Introduction**

36 The influenza glycoprotein hemagglutinin (HA) is a key target antigen for  
37 protective antibody responses because it is expressed on the surface of the virus (and  
38 infected cells) and is responsible for attachment to cellular receptors. The HA protein  
39 contains a head region and a stalk region located proximal and distal to the viral  
40 membrane, respectively. The head contains the receptor binding domains (where the  
41 influenza viruses attaches itself to the host cell), while the stalk attaches the HA to the  
42 viral envelope and mediates virus entry into the host cell. Although variation exists in  
43 both the head and stalk region of HA, the stalk region is relatively more conserved and  
44 more resistant to antigenic drift[1].The majority of protective antibodies in influenza  
45 vaccines are directed to antigenic sites (epitopes) on the head of the HA because the  
46 mechanism of action centers on the inhibition of cellular attachment[2]. Antibody  
47 responses to the stalk domain are generally lower, at least after seasonal immunization,  
48 and it is more difficult to measure correlates of protection because these antibodies do  
49 not always affect cellular attachment or neutralization[3]. Antibodies to the stalk domain  
50 can, nevertheless, be protective[4],[5]. Early experimental studies of H1N1 HA antigen  
51 demonstrated that five, non-overlapping, antigenic sites on the HA exist[6]. More recent

52 studies have shown that, in addition to the head, the stalk region contains at least a  
53 single antigenic site[6,7].

54 In 2009, a zoonotic influenza H1N1 virus antigenically distinct to currently  
55 circulating viruses caused a world-wide pandemic. To combat the virus, a new vaccine  
56 was developed from the pandemic strain. Although immune responses to influenza  
57 vaccine are usually strain specific, studies of the immune responses to the pandemic  
58 vaccine demonstrated an increase in cross-reactive antibody to other antigenically  
59 distinct strains. Moreover, these antibody responses were associated with an increase  
60 in reactivity to the more conserved stalk region of HA. Close evaluation of the  
61 immunoglobulin genes of responding antibody secreting cells demonstrated high levels  
62 of somatic mutations suggesting a role of pre-existing memory B cells in the response to  
63 H1N1 pandemic virus vaccine[8]. Moreover, avian influenza candidate vaccine trials  
64 demonstrated similar findings suggesting this is a general phenomenon of exposure to  
65 novel influenza antigens and not specific to H1N1 viruses[9].

66 Exposure of naïve individuals to influenza virus by vaccination or natural infection  
67 leads to differentiation of naïve B cells into antibody secreting cells and memory B cells  
68 that make antibodies capable of neutralizing the virus and can exist in the body for  
69 decades[10]. In addition to longevity, memory B cells have a lower threshold of B cell  
70 receptor activation, higher proliferation rates, and contain somatic mutations providing  
71 greater affinity for its cognate antigen[11]. Additionally, since naïve B cells are  
72 continually replenished from the bone marrow, differentiation of naïve B cell into  
73 memory B cells increases the overall number B cells capable of recognizing influenza  
74 virus in circulation. In this way, exposure to influenza virus by vaccination or infection

75 leads to an increased ability to mount an effective immune response to the virus upon  
76 secondary exposure. Not all HA antigenic sites elicit the same B cell response and  
77 formation of memory B cells, with B cells specific to head antigenic sites dominating the  
78 response compared to stalk antigenic sites[12], although memory B cells to the stalk  
79 due form [13]. The current thinking in the field is stalk-specific memory B cells are  
80 responsible for the difference in antibody specificities seen between seasonal and  
81 pandemic HA vaccines. HA head antigenic sites are somewhat conserved between  
82 seasonal vaccines but highly divergent in pandemic HA vaccines compared to seasonal  
83 strains[14]. It is thought that this leads to a lack of pre-existing memory B cells cross-  
84 reactive to the HA head antigenic sites of pandemic vaccines leading to decreased  
85 competition between stalk-specific and head-specific memory B cells. This decrease in  
86 competition leads to an increased stimulation of HA stalk specific memory B cells  
87 skewing the immune response (and antibodies) towards the HA stalk.

88 Elucidating the combined effect of differences in HA antigenic site conservation,  
89 pre-existing immunity, epitope dominance, and B cell and antibody specificities is a  
90 daunting task for the experimentalist. However, computational models allow explicit  
91 experimentation of biological parameters that are not possible to manipulate with typical  
92 animal and human models. Perelson et al. hypothesized that B cell receptor repertoires  
93 (paratopes) exist in an immunological shape space and antigen binding differences  
94 between them are represented as distance in shape space[15]. Smith et al.  
95 subsequently derived the parameters of such an immunological shape space for  
96 influenza viruses[16]. Moreover, Smith et al. developed a computational model of the  
97 humoral immune system and demonstrated that such a model can be used to

98 understand secondary immune responses to influenza[17]. Recently, Chaudhury et al.  
99 developed a stochastic simulation model using the parameters developed by Smith et  
100 al. and expanded the model to include multiple antigenic sites of different  
101 conservation[18].

102 We recently developed a method of estimating the antigenic relationships  
103 between the five canonical H1N1 HA head antigenic sites[19]. Here we use these  
104 estimates to expand the model developed by Chaudhury et al.[18] to include 6 epitopes  
105 representing the 5 canonical head antigenic sites and a conserved stalk antigenic site.  
106 Additionally, we expand the model to include long-lived plasma cells as was previously  
107 included in the Smith et al. model[17]. To gain theoretical insights into the role of  
108 memory B cells and pre-existing antibodies in the stalk-specific boosting of the antibody  
109 responses, we simulated humoral immune responses to the 2009 H1N1 pandemic  
110 vaccine HA antigen in systems previously exposed to antigenically similar (A/South  
111 Carolina/1/1918) or distinct (A/Brisbane/59/2007) HA antigen.

112

## 113 **Materials and methods**

### 114 **Modeling HA antigen**

115 The influenza virus HA antigen was chosen to model since antibody responses to  
116 this antigen is the primary target of vaccination. The following criteria was used to model  
117 the HA antigen: Each HA used in the simulation contains 5 distinct, equally dominant,  
118 antigenic sites representing the 5-canonical head antigenic sites of H1N1[20]. In  
119 addition, each HA contains a single, subdominant, stalk antigenic site[12].

120 Immunoglobulin interacts with antigens through the shape complementarity  
121 between the antigen-binding immunoglobulin paratope and the antigen epitope. To  
122 model antigen/immunoglobulin interactions we used the principals of Immunological  
123 Shape Space originally theorized by Perelson et al.[15]. Optimal Shape Space Theory  
124 parameters for influenza HA antigen were subsequently determined by Smith et al [16].  
125 Following the example set by Smith, the shape of antigenic sites are represented by  
126 strings of symbols that symbolically represent their shape. The shape is represented by  
127 a 20-character string made up of 4 unique characters. The length and number of unique  
128 symbols at each locations gives the following properties: a potential immunoglobulin  
129 repertoire of  $10^{12}$  B cells, a 1 in  $10^5$  chance of B cells responding to a particular antigen,  
130 and an expressed repertoire of  $10^7$  B cells [21-25].

131 In order to model the antigenic differences between strains and across antigenic  
132 sites, we used a sequence-based antigenic distance approach[19]. This approach uses  
133 HA protein sequence data to estimate the antigenic distance between antigenic sites  
134 (epitopic distances). For each head antigenic site (Sa, Sb, Ca1, Ca2, Cb), protein  
135 sequences were truncated to include only the amino acids in that site. Once an  
136 antigenic site amino acid sequence was obtained, the Hamming distance (i.e. number of  
137 amino acids differing between the sequences) was calculated. To normalize for  
138 differences in the number of amino acids in each epitope, this value was divided by the  
139 total number of amino acids in the site resulting in the percent difference (range 0 to 1)  
140 between the HAs. To convert to an individual string representing the epitopes, the  
141 percent difference was then multiplied by 20 (the number of symbols in each string) to  
142 create antigenic site-specific antigenic distances in the range of 0-20 as derived by

143 Smith et al.[16]. These antigenic site-specific distances are realized in the model by  
144 randomly changing symbols across the 20-symbol string until the Hamming distance  
145 between the virtual HA antigenic sites matched the epitopic distance calculated from the  
146 protein sequence. This was done for each antigenic site and then all antigenic sites  
147 were combined into a single virtual HA antigen in the model.

148 Unlike head antigenic sites, the exact number and location of the HA stalk region  
149 all possible antigenic sites are still largely unknown. Studies have demonstrated there  
150 are at least 1-2 epitopes in this region[12], with antibodies directed to the fusion domain  
151 having the ability to affect infectivity of the virus. We therefore chose to model a single  
152 HA stalk antigenic site (Stk). It is generally accepted that the stalk region of HA is highly  
153 conserved amongst H1N1 viruses therefore in our model the stalk antigenic site was  
154 completely conserved between HA strains, although it is likely that multiple antigenic  
155 sites exist in the stalk region and vary in conservation[1,26].

## 156 **Modeling the Humoral Immune System**

157 A first principle approach to modeling was used to create a computational model  
158 of the immune system. First principal approaches to modeling immunology attempt to  
159 use established parameters in immunological theory in order to simulate complex  
160 systems with the fewest assumptions or fitted parameters. These methods allow  
161 estimation of the true state of the system and can be used to understand complex  
162 interactions or reactions that arise from basic biological principles. Borrowing from work  
163 by Smith and Chaudhury, we chose to represent the immune response using a  
164 simplified version of the immune system representing only the B cell arm.

165           The model immune system consists of 7 agents: Naïve B cells, stimulated B  
166 cells, germinal center B cells, short-lived plasma cells, long-lived plasma cells, memory  
167 B cells, and antibody (Fig 1). In the model, Naïve B cells bind antigen and become  
168 stimulated B cells. Stimulated B cells then form germinal centers, becoming germinal  
169 center B cells capable of stochastically differentiating into plasma cells or memory B  
170 cells. Plasma cells secrete antibody capable of binding and removing antigen. Once  
171 primed, memory B cells can also be stimulated by antigen leading to stimulated B cells  
172 capable of forming germinal centers. Follicular helper T cells and antigen presenting  
173 cells are therefore modeled implicitly.

174

175 **Fig 1. Schematic Representation of Humoral Immune System Model.**

176

### 177 **Simulating biological reactions**

178           The agent based simulation method, developed by Chaudhury *et al.* 2013[18],  
179 uses a stochastic chemical-kinetics based approach[27,28] to simulate the progression  
180 of an immune response at a repertoire-scale, where components such as B cells,  
181 antigens, or antibodies are modeled as chemical species, and processes such as  
182 antigen-binding, somatic mutations, or B cell replication are modeled as chemical  
183 reactions; all parameters in the model were set as previously described[18] with of  
184 addition of long-lived plasma cell parameters(Table 1).

185

186 **Table 1. Model Parameters**

| Parameter            | Symbol | Value                 |
|----------------------|--------|-----------------------|
| No. of naïve B cells |        | $5 \times 10^7$ cells |



|                                      |                                   |                                    |
|--------------------------------------|-----------------------------------|------------------------------------|
| Ag dose                              |                                   | 360 units                          |
| GC carrying capacity                 | <b><i>k</i></b>                   | 5000 cells                         |
| Ag parameters                        |                                   |                                    |
| <b><u>Epitopes</u></b>               |                                   | 6                                  |
| <b>Epitopes1</b>                     |                                   |                                    |
| Immunogenicity                       | <b><i>y</i></b>                   | 0.8                                |
| Clearance                            | <b><i>p</i></b>                   | $1.0 \times 10^{-4}$<br>cells      |
| Epitopic distance                    |                                   | 0                                  |
| <b>Epitope 2-6</b>                   |                                   |                                    |
| Immunogenicity                       | <b><i>y</i></b>                   | 1.2                                |
| Clearance                            | <b><i>p</i></b>                   | $1.0 \times 10^{-4}$<br>cells      |
| Epitopic distance                    |                                   | Varied                             |
| Intrinsic decay                      | <b><i>gAg</i></b>                 | $(12 \text{ h})^{-1}$              |
| <b><u>B cell parameters</u></b>      |                                   |                                    |
| B cell enhancement factor            | <b><math>\epsilon_B</math></b>    | 10                                 |
| Ab enhancement factor                | <b><math>\epsilon_{Ab}</math></b> | 2.5                                |
| Naïve B cell formation rate          | <b><i>kN</i></b>                  | $(4.6 \times 10^5 \text{ h})^{-1}$ |
| Naïve B cell stimulation rate        | <b><math>\sigma_N</math></b>      | $(1 \text{ d})^{-1}$               |
| GC B cell stimulation rate (base)    | <b><math>\sigma_{base}</math></b> | $(8 \text{ h})^{-1}$               |
| GC B cell stimulation rate (maximum) | <b><math>\sigma_{max}</math></b>  | $(15 \text{ min})^{-1}$            |
| GC B cell replication rate           | <b><i>r</i></b>                   | $(8 \text{ h})^{-1}$               |
| Mutation probability                 | <b><math>\mu</math></b>           | 0.1                                |
| Differentiation probability          | <b><math>\delta</math></b>        | 0.1                                |
| Memory cell stimulation              | <b><math>\sigma_{Max}</math></b>  | $(1 \text{ d})^{-1}$               |
| Ab production rate                   | <b><i>kAb</i></b>                 | 1                                  |
| Naïve B cell decay rate              | <b><i>gB</i></b>                  | $(4.5 \text{ d})^{-1}$             |
| GC b cell decay rate (base)          | <b><i>gB</i></b>                  | $(4.5 \text{ d})^{-1}$             |
| Plasma cell decay rate               | <b><i>gP</i></b>                  | $(3 \text{ d})^{-1}$               |
| Ab decay rate                        | <b><i>gAb</i></b>                 | $(10 \text{ d})^{-1}$              |

187

188           The simulated immune response to antigen was modeled by using a simplified

189 version of the humoral immune system. The model attempts to describe the process

190 that governs how naïve B cells become stimulated after encounter with antigen and

191 subsequently enter into germinal center reactions leading to production of memory B  
192 cells and antibody secreting cells. Additionally, affinity maturation is described in a way  
193 that models affinity increasing over time due to competition between B cells and limiting  
194 antigen. Antigen is immediately removed from the system if bound by antibody. This  
195 simplified approach allows the model to reflect how activation of the adaptive B cell  
196 response leads to the eventual clearance of antigen from the host.

197 Simulations were carried out by defining a set of rate equations that describe the  
198 underlying biological reactions and then applying the Gillespie algorithm, a dynamic  
199 Monte Carlo method [18,29]. The main parameters that were set in order to model B cell  
200 responses to HA antigen in the simulation were the number of antigenic sites for each  
201 antigen, the immunogenicity of each site, and the epitopic distance for each antigenic  
202 site between HA strains. Immunogenicity parameters for HA antigenic sites were  
203 chosen from experimental mouse studies[30,31]. These studies suggest that stalk-  
204 specific antibody responses make up about 20% of the total response[30,32]. Therefore  
205 an immunogenicity parameter value for each antigenic site was used to account for  
206 these differences (Table 1). An immunogenicity parameter of one represents equal  
207 immunogenicity. Because the HA head is immunodominant compared to the stalk,  
208 immunogenicity parameters were adjusted to 0.8 for the stalk antigenic site and 1.2 for  
209 all head antigenic sites which resulted in a primary antibody responses in the simulation  
210 that was five-fold lower to the stalk antigenic site compared to a single head antigenic  
211 site, comparable to experimentally determined responses[30,32].

212 In the simulation, the binding affinity between the paratope and antigenic sites is  
213 proportional to the number of symbols that are complementary between them (their

214 Hamming distance). Two antigenic sites cease to be cross-reactive when a 35% change  
215 or more in amino acid sequence in the amino acids that make up each HA antigenic  
216 site[33,34]. Therefore, there are eight degrees of cross-reactivity between epitopes  
217 corresponding to epitopic distances 0 through 7. Although epitopic distance ranged from  
218 0 to 7, affinity ranged for each site can vary from 4 to 7 reflecting the degeneracy in  
219 paratope sequences that can achieve maximum binding affinity to their epitope. This  
220 range represents a  $10^4$ -fold difference in binding affinity of the immunoglobulin between  
221 naïve and fully matured B cells.

## 222 Rate Equations

223 The binding affinity ( $Q_{ij}$ ) between paratope  $i$  and the epitope  $j$  is a function of their  
224 Hamming distances,  $d(i,j)$  (eq. 1). Parameter  $\varepsilon$  is an enhancement factor that reflects  
225 the fold increase in apparent binding of B cells compared to antibodies (10 and 2.5,  
226 respectively). The increased avidity of B cells in comparison to a single antibody in the  
227 model reflects the many immunoglobulin molecules found on the surface of B cells  
228 resulting in many possible interactions between B cells and antigen[18]. Parameters,  $\alpha$   
229 and  $\lambda$ , represent the minimum and maximum Hamming distance (4 and 7, respectively).

230

$$231 \quad ((1)) \quad Q_{ij} = \begin{cases} 1, & d(i,j) < \alpha \\ \varepsilon^{\alpha-d(i,j)}, & \alpha \leq d(i,j) \leq \lambda \\ 0, & d(i,j) > \lambda \end{cases}$$

232 The model simulates an animal size B cell repertoire of  $10^7$ - $10^8$  B cells [24,25].  
233 The life expectancy of unstimulated (naïve) B cells is 4.5 days. Naive B cells with  
234 randomly generated immunoglobulin are created such that there is steady population of  
235  $5 \times 10^7$  naive B cells specific to each antigen and the numbers of naïve B cells are

236 balanced so equal numbers of B cells are specific to each antigenic site of the antigen.

237 For all antigens in the population ( $P_{Ag}$ ), the rate ( $P_{Ag}gN$ ) of naive B cell ( $N$ ) decay was

238 set to  $(4.5 \text{ d})^{-1}$  (2a). The formation rate of naïve B cells ( $kN$ ) was modeled as a first-

239 order reaction where the rate was dependent on the naïve B cell population size ( $5 \times 10^7$ )

240 per antigen in the population ( $P_{Ag}$ ) and set to  $(4.6 \times 10^5 \text{ h})^{-1}$  (2b).

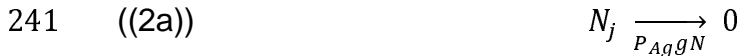

242

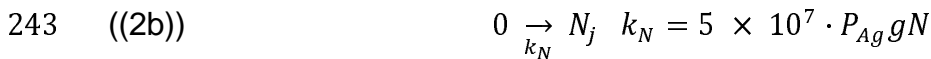

244

245 Naïve B cells stimulation was modeled as a second-order reaction between the

246 antigen and naïve B cells. The rate of this reaction was determined by the base

247 stimulation rate, immunogenicity of the antigenic site, and the binding affinity between

248 the paratope and antigenic site. The stimulation rate was set to 3 days for naïve and

249 memory B cells. The stimulation rate for germinal center B cells was set to 8hrs with a

250 maximum stimulation rate of 15 minutes reflecting the rapid stimulation of germinal

251 center B cells. The rate that naïve B cells ( $N$ ) form germinal centers ( $B$ ) was modeled as

252 a second-order rate equation dependent on the affinity of the B cell for an antigen  $i$  for

253 epitope  $j$  ( $Q_{ij}$ ), antigen ( $Ag$ ) epitope immunogenicity ( $\square$ ), and a stimulation rate multiplier

254  $\sigma N$  (3a). The rate of germinal center B cell ( $B$ ) stimulation was modeled as a second-

255 order rate equation dependent on the affinity of the B cell for an antigen epitope ( $Q_{ij}$ ),

256 antigen ( $Ag$ ) epitope immunogenicity ( $\square$ ), and a stimulation rate multiplier  $\sigma_B$  (eq. 3b).

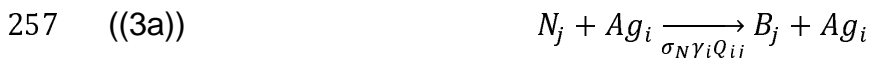

258

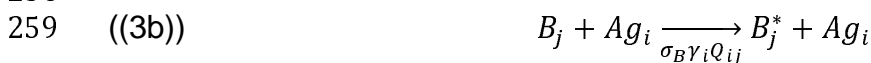

260

261            Germinal center B cell proliferation was modeled as a first-order reaction. The  
262 product of proliferation is a single daughter B cell containing at most a single mutation  
263 from the parent genotype. The replication rate ( $r$ ) was set to a doubling time of 8hrs.  
264 Although in reality antigen is consumed during this process, for simplicity, antigen was  
265 not consumed during B cell activation. A constant rate of differentiation ( $\delta$ ) for germinal  
266 center B cells was used with a probability of differentiation set to 0.1. Germinal center B  
267 cells have equal probability of differentiating into antibody secreting cells or memory B  
268 cells. Antibody secreting cells had a 75% chance of having a half-life of 3 days (short-  
269 lived antibody secreting cells), and a 25% chance of having a half-life of 200 days (long-  
270 lived antibody secreting cells). Affinity maturation occurs in the germinal center under  
271 high apoptotic pressure that drives the selection of higher-affinity immunoglobulin  
272 receptors. A carrying capacity for the germinal center was set to 5000 B cells. As the  
273 germinal center B cell population expands so does the rate of germinal center B cell  
274 decay. When the germinal center reaches the carrying capacity, the germinal center B  
275 cell decay rate reaches the replication rate halting further expansion of the germinal  
276 center. Germinal center B cell ( $B^*$ ) proliferation was modeled as a first-order rate  
277 equation dependent on the B cell replication rate ( $r$ ) and the probability of mutation from  
278 genotype  $j$  to genotype  $k$  ( $R_{jk}$ ) and is defined as  $R_{jk} = (1 - \mu)^{19}(\mu/3)$  where  $\mu$  is the  
279 mutation rate (eq. 4a). A first-order rate equation was used to model memory B cells ( $M$ )  
280 (eq. 4b) antibody secreting cells ( $P$ ) dependent on the differentiation rate of  $\delta$  (eq. 4c).  
281 Apoptosis of germinal center B cells was modeled using a second-order equation  
282 dependent on the apoptosis rate  $\eta$ , which was a function of the B cell replication rate ( $r$ )  
283 and the total GC B cell population ( $B$ ) relative to the GC carrying capacity  $k$  (eq. 4d).

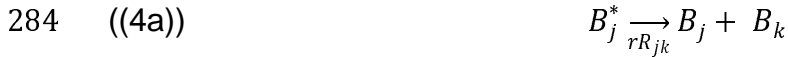

285

286

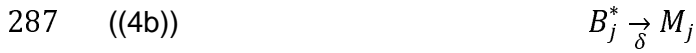

288

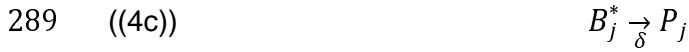

290

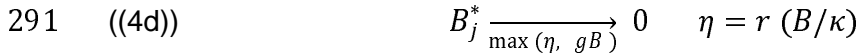

292

293

294 Antibody is produced from antibody secreting cells with a decay rate based on a  
 295 half-life of 3 days. Each antibody in the simulation represents a large number of real  
 296 antibodies. Antibody production was dependent on presence of antibody secreting cells  
 297 ( $P_s, P_l$ ), which contain different decay rates. Antibody production was modeled based  
 298 on a production rate,  $k_{Ab}$  (eq. 5a). Short-lived antibody secreting cell ( $sP$ ) decay was  
 299 modeled as a first-order reaction with a decay rate of  $gP_s$  (eq 5b). Long-lived antibody  
 300 secreting cell decay was modeled as a first-order reaction with a decay rate of  $gP_l$  (eq.  
 301 5c).

302

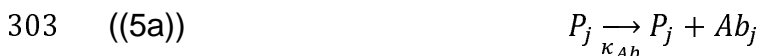

304

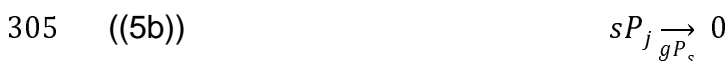

306

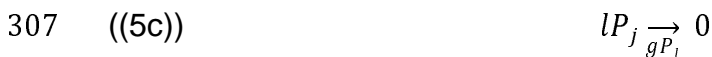

308

309 Memory B cells do not decay in the simulation. In the model, memory B cells can  
 310 also give rise to germinal center B cells and antigens. Memory B cells have an

311 increased rate of simulation compared to naïve B cells giving them a competitive  
312 advantage independent of their genotype. Additionally, given that memory B cells can  
313 arise from mutated germinal center B cells with increased affinity, memory B cells can  
314 also have greater affinity for the antigen compared to naive B cells, giving them an  
315 additional rate advantage over naïve B cells. The rate of memory B cells was dependent  
316 on the stimulation rate set to  $(1d)^{-1}$  and the immunogenicity parameter ( $\gamma$ ).

317

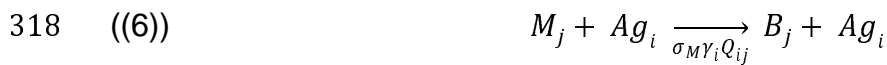

319

320 Antibodies bind and remove antigen using a second-order reaction with a  
321 reaction rate that is the function of the binding affinity between the antibody paratope  
322 and antigen epitope, as well as the clearance and neutralization parameter (these  
323 values were constant between all epitopes) (eq. 7a). Intrinsic antibody (Ab) decay was  
324 based on a half-life of 10 days and modeled using a first-order rate equation dependent  
325 on the decay rate  $g_{Ab}$  (eq. 7b). Intrinsic antigen decay was modeled based on a half-life  
326 of 12hrs and modeled using a first-order reaction dependent the antigen decay rate  $g_{Ag}$   
327 (eq. 8).

328

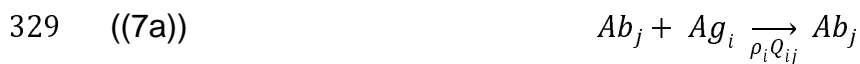

330

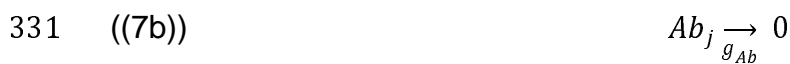

332

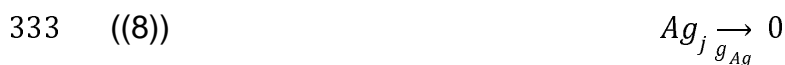

334

### 335 **Historical Strain Protein Sequences**

336 Influenza HA protein sequences used in the model were obtained from Genbank:

337 A/California/07/2009 [NC\_026433], A/Brisbane/59/2007 [KP458398], A/South

338 Carolina/01/1918 [AF117241], A/Beijing/262/1995[AAP34323], A/Brazil/11/1978

339 [A4GBX7], A/Chile/1/1983 [A4GCH5], A/New Caledonia/20/99 [AY289929],

340 A/Singapore/6/1986 [ABO38395], A/Solomon Islands/3/2006 [ABU99109],

341 A/USSR/90/1977 [P03453], A/New Jersey/11/1976 [ACU80014].

### 342 **2009 H1N1 Vaccine Clinical Trial Human Serum**

343 As a means to test specific predictions of the simulations in a real world situation,

344 healthy adults and children were enrolled in age cohorts as previously described[13].

345 Results of this clinical trial have been published previously[13]. Subjects received a

346 single intramuscular (i.m.) injection of inactivated influenza A/California/07/2009 (H1N1)

347 monovalent subunit vaccine (Novartis). Each 0.5-ml dose contained 15µg of HA

348 antigen. Administration of the vaccine (study day 0) took place from January 2010 to

349 March 2010. The study was conducted under a protocol approved by the University of

350 Rochester Research Subjects Review Board. Informed written consent was obtained

351 from each participant. ClinicalTrials.gov identifier NCT01055184.

### 352 **Enzyme-linked Immunosorbent Assay**

353 Recombinant HA proteins were obtained from Influenza Reagent Resource

354 (Cat#: FR-67, FR-692, FR-65, FR-180, FR-699) and BEI Resources (Cat# NR-19240,

355 NR-48873). Chimera proteins were a gift from Dr. Florian Krammer.

356 Enzyme-linked immunosorbent assays were performed using recombinant HA

357 proteins coated on MaxiSorb 96-well plates (ThermoSci; 439454) overnight at 4°C.

358 Plates were blocked with 3% bovine serum albumin (BSA) in phosphate buffered saline



359 (PBS) for 1hr at room temperature. Serum was diluted 1:1000 in PBS/0.5% BSA/0.05%  
360 Tween-20. Plates were washed and incubated with alkaline phosphatase (AP)-  
361 conjugated secondary antibody for 2 hrs at room temperature. Plates were washed and  
362 developed using AP substrate (ThermoSci 34064).

### 363 Antigen Clearance Kinetics

364 A separate exponential decay model was fit to the data for each group to assess  
365 the difference in exponential decay rate. The model is specified as:

$$366 y_{ij} = (V_1 + b_{1i}) * \exp \{-(\beta_1 + b_{2i})t_j\} + \epsilon_{ij} \text{ for group SC18,}$$

367 And

$$368 y_{ij} = (V_2 + b_{1i}) * \exp \{-(\beta_2 + b_{2i})t_j\} + \epsilon_{ij} \text{ for BR07}$$

369 where  $y_{ij}$  is the viral load for the  $i^{th}$  subject at the  $j^{th}$  time point, and  $t_j$  represents the  
370 time points in hours. Random effects,  $b_{1i}$  and  $b_{2i}$ , are included to account for between-  
371 individual variability. The exponential decay rate is represented by  $\beta_1$  and  $\beta_2$  for group  
372 1 and 2, respectively. To test for differences in the decay rates, the model was fit using  
373 PROC NLMIXED within SAS v9.4.  
374

### 375 Statistics

376 All group comparisons were done using Student's two-tailed t-test. A p-value of  
377 0.05 or less was considered statistically significant.

### 378 Results

379  
380 To better understand how repeated exposure to vaccines can focus the immune  
381 response to the stalk region of the influenza HA protein, we expanded the stochastic model  
382 developed by Chaudhury et al.[18] (Fig 1). The model represents a simplified humoral  
383 immune system where a B cell is represented as a character string (e.g.  
384 "AAAAABBBBBCCCCDDDD") which are randomly generated by a random number

385 generator, reflecting the random nature of B cell receptors development *in vivo*. Naive B  
386 cells are continually generated and naturally decay unless stimulated by antigen, where  
387 they differentiate into memory B cells and plasma cells. During the simulation, B cells had a  
388 probability of being stimulated by their cognate antigen strings, replicating, differentiating  
389 into plasma or memory B cells, and producing antibody. The six HA antigenic sites (5 head,  
390 1 stalk) are also represented as character strings in the model(e.g.  
391 “BBAAABBBBBCCCCDDDDD”), but these strings are derived from virus sequence data  
392 using a sequence-based antigenic distance approach[19]. During the simulation antibody  
393 can then bind the antigen and remove it from the simulation. In this way, the model  
394 captures the antigenic differences between strains and reflects the ability of the immune  
395 system to adapt to inoculum producing antigenic site-specific antibodies from randomly  
396 generated B cell receptors.

### 397 **Antigenic Distance Determination**

398 We first determined antigenic distances (AD) using protein sequence data for 11  
399 HA proteins using the sequence-based antigenic distance approach previously  
400 described[19]. Vaccine and prototypical influenza virus strains were chosen to represent  
401 antigenically distinct strains that have circulated since 1918 (see methods section).  
402 Given that each HA in the model contains 6 antigenic sites, and each antigenic site in  
403 the model contains 20 positions, the maximum epitopic distance (antigenic-site-specific  
404 antigenic distance; ED) is 20 and the maximum AD for each antigen is 120. Overall,  
405 SC18 and CA09 had the greatest similarity with an AD of 21 (Table 2) with BR07 and  
406 CA09 having the greatest difference with 53 AD. Antibody cross-reactivity in the model  
407 occurs when an epitopic distance is seven or less in the model[17,18]. SC18 and CA09

408 had four of the five head epitopes with an ED of less than or equal to seven, with the Sa  
409 antigenic site having the least distance (Table 3). Alternatively, SC18 and BR07 had  
410 only one antigenic site with an ED of less than seven. Thus, in the model SC18 was  
411 antigenically more similar to CA09 while BR07 was largely antigenically distinct (Table  
412 2). Using these distances, strings virtually representing the antigenic sites of HA were  
413 constructed.

414

415 **Table 2 Antigenic Distances**

|      | SC18 | PR34 | NJ76 | US77 | BR78 | SI86 | CH83 | BE95 | NC99 | SI06 | BR07 | CA09 |
|------|------|------|------|------|------|------|------|------|------|------|------|------|
| SC18 | 0    |      |      |      |      |      |      |      |      |      |      |      |
| PR34 | 43   | 0    |      |      |      |      |      |      |      |      |      |      |
| NJ76 | 16   | 43   | 0    |      |      |      |      |      |      |      |      |      |
| US77 | 50   | 46   | 50   | 0    |      |      |      |      |      |      |      |      |
| BR78 | 50   | 46   | 50   | 0    | 0    |      |      |      |      |      |      |      |
| SI86 | 45   | 48   | 53   | 18   | 18   | 0    |      |      |      |      |      |      |
| CH83 | 50   | 48   | 53   | 4    | 4    | 16   | 0    |      |      |      |      |      |
| BE95 | 53   | 48   | 53   | 22   | 22   | 21   | 23   | 0    |      |      |      |      |
| NC99 | 48   | 45   | 55   | 31   | 31   | 18   | 29   | 10   | 0    |      |      |      |
| SI06 | 47   | 50   | 54   | 35   | 35   | 23   | 33   | 18   | 10   | 0    |      |      |
| BR07 | 49   | 50   | 56   | 34   | 34   | 22   | 32   | 17   | 7    | 8    | 0    |      |
| CA09 | 21   | 48   | 24   | 55   | 55   | 50   | 55   | 58   | 53   | 51   | 53   | 0    |

416

417 **Table 3 Eptopic Distances**

| Epitope  | ED to CA09 |
|----------|------------|
| SC18-Sa  | 2          |
| BR07-Sa  | 8          |
| SC18-Sb  | 3          |
| BR07-Sb  | 15         |
| SC18-Ca1 | 5          |
| BR07-Ca1 | 7          |
| SC18-Ca2 | 8          |

|          |    |
|----------|----|
| BR07-Ca2 | 10 |
| SC18-Cb  | 3  |
| BR07-Cb  | 13 |

418

419

## 420 **Simulating the 2009 Pandemic**

421 Simulations were carried out representing the real-life scenarios that occurred  
422 during the 2009 influenza pandemic. Two scenarios were simulated with 50 simulations  
423 carried out for each scenario. In scenario one, the model was “immunized” (primed) with  
424 the 1918 pandemic virus HA, A/South Carolina/1/1918 (SC18), then the immune  
425 response was allowed to resolve for 365 days, during which antibody level to returned  
426 close to baseline. Scenario two was identical to scenario one except the model was  
427 primed with the 2008 vaccine strain HA, A/Brisbane/59/2007 (BR07). Both groups were  
428 then re-immunized (boosted) with the 2009 pandemic virus vaccine HA (CA09). In this  
429 way, the “SC18 primed group” represented individuals that in 2009 had been previously  
430 exposed to 1918-like viruses and the “BR07 primed group” represented individuals  
431 primed by more recent seasonal influenza strains. B cell and antibody counts, genotype,  
432 and antigen specificities were tracked during the simulation allowing quantification of  
433 antigenic-site-specific B cells and antibodies during the simulation.

## 434 **Antigenic Site Specific Antibody Responses**

435 Given that the model represents a naïve immune system, immune responses  
436 specific to priming antigen (SC18 or BR07) should be identical between groups. To  
437 determine that the model was unbiased towards which priming antigen was used,  
438 antigenic site specific antibodies and memory B cells specific to the priming Ag were  
439 measured throughout the simulation, while in humans they are typically measured at

440 day 28-30 post immunization. Counts of antibody and memory B cells in the simulation  
441 reactive to the priming antigen were similar across head epitopes and between groups  
442 (Fig 2A, S1 Fig A-D) and these similarities remained up until boosting (S1 Fig E-F).  
443 Stalk-specific antibody and memory B cell counts were significantly less than head  
444 antigenic sites making up about 10% of the total response and were similar for both  
445 groups (S1 Fig E and F). Overall, antibody and memory B cell counts and specificities to  
446 their priming antigen were similar for both priming groups demonstrating that the model  
447 is unbiased towards the priming antigen.

448

## 449 **Fig 2. Immune Responses After Prime and Boost.**

450 (A) Antigenic-site-specific antibody titers to each HA epitope included in the model for  
451 the SC18 primed group (right) and BR07 primed group (left). Curves represent average  
452 titers for 50 simulations and range is the standard deviation. (B) Average antibody titers  
453 cross-reactive to CA09 pre-boost (Day 365) and (C) memory B cells. (D) Affinity  
454 (antigenic distances 1-7) of memory B cells to CA09 HA antigen. (E) Percent of stalk  
455 antigenic site specific antibody for each priming group.

456

457         Although immune responses to their priming antigen were similar between  
458 groups, we sought to determine if the cross-reactivity to CA09 was different between the  
459 priming groups prior to boosting as expected by the closer antigenic distance between  
460 SC18 and CA09 compared to BR07 an CA09. Unlike reactivity to priming antigen,  
461 antibody and memory B cells cross-reactive to CA09 after priming was markedly  
462 differently between groups with significantly higher CA09 cross-reactive antibodies in

463 the SC18 primed group compared to the BR07 primed group with a greater than 2-fold  
464 difference in cross-reactive antibodies and memory B cells to CA09 just prior to  
465 boosting (Fig 2B-C). The affinity of the cross-reactive memory B cells to CA09 was also  
466 different between the groups, with the SC18 group having higher affinity compared to  
467 the BR07 group (Fig 2D). Therefore, although immune responses specific to the priming  
468 antigen were similar between groups, cross-reactive antibody and memory B cells were  
469 significantly different.

470         Next, we sought to determine the effect of priming on secondary immune  
471 responses to CA09 and assess differences in B cell/antibody totals and antigenic site  
472 specificities. After boosting with CA09, total antibody levels reactive to CA09 in the  
473 SC18 group were higher compared to the BR07 group, although this difference did not  
474 reach significance (S2 Fig A). The SC18 primed group produced a Sa-antigenic-site  
475 dominant response to CA09 with Sb and Cb antigenic-site specific antibodies also  
476 boosted (Fig 2A). Stalk antigenic site antibody was also boosted but to a lesser extent  
477 than the head epitopes making up about 15% of the antibody response (Fig 2E). In  
478 contrast, stalk-specific antibody responses for the BR07 primed group dominated (Fig  
479 2A) comprising 35% of the total antibody response (Fig 2E) and showed a more  
480 moderate increase in other antigenic site specific antibodies (Fig 2A). These antigenic  
481 site-specific differences between groups generally corresponded to differences in  
482 epitopic distances between the primary and secondary antigen (Table 3) except for the  
483 stalk antigenic site, which is conserved between priming and boost antigens in both  
484 groups.

### 485 **Pre-Exposure Affects Cross-Reactivity of Secondary Responses**

486       Given differences in antigenic-site-specificities between groups and the  
487 dissimilarities in conservation of those sites between strains, we set out to determine  
488 antibody cross-reactivity after boosting with CA09 to a panel of antigenically distinct  
489 strains that have circulated since 1918. Cross-reactive antibody responses were  
490 measured day 30 post-boosting with CA09. Both groups had strong responses to the  
491 antigens to which they had been exposed, but differed largely in responses to other  
492 strains (Fig 3A). Generally, the SC18 group was cross-reactive to strains antigenically  
493 similar to CA09, while the BR07 group's antibody response was cross-reactive to more  
494 antigenically distinct strains. Cross-reactive titers in the SC18 primed group correlated  
495 well with the antigenic distance from CA09, while the BR07 primed group antibody  
496 cross-reactivity showed no linear correlation with antigenic distance (pval = 0.0001, pval  
497 = 0.4983; respectively). Therefore, although antigenic distance was a good predictor of  
498 cross-reactivity during the primary response of the simulation, for secondary immune  
499 responses, epitopic distance alone is not sufficient to predict cross-reactive immune  
500 responses.

501

### 502 **Fig 3. Crossreactivity After Boosting with CA09.**

503 (A) Heatmap of all simulations for the SC18 primed group and the BR07 primed group  
504 measured at day 30 post-boost (day 395) to 12 historical HA antigens. Values were log  
505 transformed. (B) Pie-chart representing the percent of simulations that contain cross-  
506 reactive antibodies to 1-11 strains for each group. Asterisk represents statistically  
507 significant difference (pValue < 0.05) between SC18 and BR07 groups.

508

509 Overall, the BR07 primed group had a statistically significant increase in cross-  
510 reactive responses to all antigens compared to the SC18 group with 20% of the  
511 antibodies cross-reactive to all 11 strains (Fig 3B). Additionally, cross-reactivity to 5-7  
512 strains was also boosted indicating that the increase in cross-reactivity in the BR07  
513 group was not only due to boosting of stalk-specific antibodies but also increased cross-  
514 reactivity of antibodies specific to the HA head antigenic sites. Interestingly, antigen was  
515 cleared more quickly in the SC18 group compared to the BR07 group ( $p = 0.0001$ ; S2  
516 Fig B) suggesting that pre-existing cross-reactive immunity affects antigen load, and  
517 may limit the duration of antigen stimulation. Overall, the BR07 primed group produced  
518 a greater cross-reactive antibody response compared to the SC18 primed group due to  
519 both an increase in cross-reactive stalk and head antigenic site specific antibodies.

#### 520 [Contribution of Memory B cells and Antibody on Cross-Reactivity](#)

521 Since cross-reactive antibodies and memory B cells to CA09 existed prior  
522 boosting with CA09, we sought to address the contribution of preexisting antibody and  
523 memory B cells on the increase in stalk-specific antibodies and cross-reactivity after  
524 exposure to CA09. To this end, two perturbed models were created. For one model (“No  
525 Clearance”) the antibody clearance was removed from the simulations in such that only  
526 basal decay of the antigen occurred. In this way, the effect of antibody-mediated  
527 removal of antigen on the secondary immune response was assessed. For the other  
528 model (“No Memory”) the memory B cell activation was removed from the simulation  
529 such that only naïve B cells contributed to the germinal center reactions. In this way, the  
530 effect of memory B cell germinal center seeding on the cross-reactivity of the secondary  
531 immune response could be assessed. By comparing these two models, the relative



532 contribution of antibodies and memory B cells on cross-reactivity of the secondary  
533 immune response in the simulation could be assessed.

534 Both perturbations affected the cross-reactive and stalk specific response after  
535 boosting with CA09 for both priming groups, although in surprisingly different ways. For  
536 the SC18 group, removal of the memory B cell germinal center contribution relatively  
537 increased the cross-reactivity to historical antigens compared to the unperturbed  
538 (“Normal”) model (Fig 4A) although stalk-specific antibody was decreased compared to  
539 “Normal” model (Fig 4C). Removal of antibody clearance for the SC18 group also  
540 increased antibody cross-reactivity, but to a lesser extent compared to the “No Memory”  
541 model (Fig 4A). For the BR07 group, removal of antibody clearance also increased the  
542 cross-reactive response, but unlike the SC18 group, removal of memory B cells from  
543 the germinal centers drastically decreased the cross-reactive response (Fig 4B). Stalk-  
544 specific antibody was also significantly increased in the “No Clearance” model, but  
545 significantly decreased in the “No Memory” model. Therefore, both antibodies and  
546 memory B cells affect the antigenic sites targeted during the secondary immune  
547 response, but how memory B cell affects the immune response depends on the  
548 antigenic relationship between the priming strain and secondary strain.

549

#### 550 **Fig. 4 Antibody Titers After Perturbation of the Model**

551 (A) Antibody titers measured at day 30 post-boost with CA09 for the SC18 primed group  
552 (B) or BR07 primed group. Data was generated from the Normal model, No Ab  
553 Clearance model, and No Memory Stimulation model. Values were log transformed. (C)  
554 Stalk-specific antibodies 30 days post boost with CA09.

555

## 556 **Boosting HA Stalk Responses**

557 In order to better understand stalk-specific antibody responses in the model,  
558 additional simulations were performed where a single parameter was changed and stalk  
559 antigenic site-specific antibody levels were measured. Four parameters were tested:  
560 stalk antigenic site immunogenicity, the number of antigen exposures, the number of  
561 head antigenic sites, and head antigenic site epitopic distances. 50 simulations were  
562 performed for each type of simulation and the count of stalk reactive antibodies was  
563 tracked. Data is presented as the average of the 50 simulations.

564 The antigenic site immunogenicity parameter simulates changes in the minimum  
565 B cell receptor affinity required to stimulate a B cell. Low immunogenicity antigenic sites  
566 require higher affinity B cells compared to higher immunogenicity antigenic sites. For  
567 simplicity, simulations were prime and boosted with a two-antigenic-site antigen (i.e.  
568 head and stalk) with equal epitopic distance (homologous). The antigenic site  
569 immunogenicity was varied over a two-fold range (0.6-1.2). As the stalk antigenic site  
570 immunogenicity was increased the stalk-specific antibodies steadily increased (Fig 5A).  
571 A two-fold increase in the immunogenicity parameter (0.6 to 1.2) led to a 20% increase  
572 in stalk epitope-specific antibodies on average (5045 to 6044). Therefore,  
573 immunogenicity of an antigenic site does modestly impact the level antibodies against  
574 that antigenic site.

575

## 576 **Fig. 5 Model Parameters on Stalk Binding Antibody Counts**

577 Counts of antibodies specific to stalk antigenic site were determined at day 30 post-  
578 boost of the second antigen challenge. (A) Stalk specific antibody counts in models with

579 different stalk epitope immunogenicity parameters. (B) Stalk specific antibody counts in  
580 model with different numbers of homologous antigen exposures (C) Stalk specific  
581 antibody counts in models with antigens that contain different numbers of head  
582 antigenic sites D) Stalk specific antibody counts in models where the head epitopic  
583 distance is increased.

584

585         Recently, Nachbagaer et al demonstrated that both stalk and head-specific  
586 antibodies are increased upon repeated exposure to influenza [35]. In our original  
587 simulations, each group was exposed to antigen twice (prime and boost) and both  
588 groups showed an increase in stalk specific antibodies (see Fig 2A), but it is not clear to  
589 what extent this increase was due to repeat exposure to antigen and how much was  
590 due to antigenic properties of the boosting antigen. In order to separate heterologous  
591 affects and repeat exposure affects, the number of exposures to homologous antigen  
592 was varied (1-5 exposures). Stalk-antigenic-site-specific antibodies increase from prime  
593 to boost by 32% and rose only slightly after with additional exposures (Fig 5B).  
594 Therefore, stalk-specific antibody responses can be boosted by repeat exposure to  
595 homologous antigen, but there is a limit and the levels quickly plateau.

596         Next, the number of antigenic sites defined in the model was varied. Although 5  
597 canonical antigenic sites have been described, others have reported additional  
598 antigenic regions[36]. All parameters were kept constant except the number of head  
599 antigenic sites, which was varied from 1-6 sites. Stalk-antigenic-site specific antibodies  
600 decreased as the number of head epitopes increased (Fig 5C). Increasing the number  
601 of head epitopes from one to six led to a 68% decrease in the number stalk-antigenic-

602 site specific antibodies. Therefore, the number of head epitopes used is not arbitrary,  
603 and the choice does affect the level of antibodies specific to the stalk. Although we  
604 chose to explicitly model subdominance as an intrinsic property of the stalk antigenic  
605 site as has been reported [8], it is likely that this subdominance also occurs as a result  
606 of the ratio of stalk to head antigenic sites.

607         Lastly, although the change in epitopic distance of head epitopes is thought to be  
608 the cause of the increase in stalk-antigenic site specific antibodies seen after boosting  
609 with CA09 in the BR07 group in our simulations, the extent that antigenic change in the  
610 head increases antibody responses to the stalk was not directly tested. Therefore, to  
611 evaluate the effect of epitopic distance of head antigenic sites on the stalk-specific  
612 antibody response, a two-antigenic-site antigen (head and stalk) was used. All  
613 parameters were kept constant except the epitopic distance of the head antigenic site,  
614 which was increased from 0 (fully conserved) to 10 (highly variable). Stalk antigenic  
615 site-specific antibody increased linearly as epitopic distance was increased from 0 to 5  
616 (over 200% increase) and plateaued when epitopic distance was increased beyond 5  
617 (Fig 5D). Therefore, the epitopic distance between head antigenic sites greatly affects  
618 antibody responses to the stalk.

619         Taken together, epitopic distance increases of the head epitope had the largest  
620 effect on stalk antigenic site specific antibody levels after boosting. Although all  
621 parameters demonstrated some effect on the stalk-antigenic site specific antibodies,  
622 these were modest when compared to the effect of epitopic distance. The decrease in  
623 stalk antigenic site specific antibodies when the number of head antigenic sites was  
624 increased may lend itself to the still unanswered question in the field of how difference

625 in the ratio of head to stalk epitopes of HA affects the subdominance of the stalk  
626 antigenic site. If indeed the head contains more antigenic sites than the stalk, the model  
627 predicts that stalk-antigenic site response will be decreased. It is important to note that  
628 this analysis demonstrates stalk-antigenic site-specific antibody truly decreases with the  
629 addition of head antigenic sites, and it is not only that stalk-specific antibodies remain  
630 constant and only the relative amount compared to the head is changed. It also  
631 suggests that the immunologic subdominance of the stalk does not necessarily mean it  
632 is inherently less immunogenic, having implications for targeting this domain in universal  
633 vaccination.

#### 634 **Predicting Antibody Responses**

635 Although not the primary aim of this work, the fact that our simulations stem from  
636 real life virus strains allows us to explore the possibility of using such an algorithm to  
637 predict immune responses to real life vaccines. Perfect validation would require  
638 specimens from age-matched subjects after vaccination with monovalent CA09 vaccine  
639 with documented exposure histories or accurately measured antibody and memory B  
640 cell repertoires, but this is not currently possible. Therefore, we attempted to determine  
641 if the simulations can be used to accurately predict the increase in stalk-specific  
642 antibody and increased cross reactivity seen in the BR07 exposed groups by using an  
643 age-stratified cohort under the assumption that those born prior to 1947 were originally  
644 exposed to 1918-like strains and those born after 1977 were exposed to the more  
645 BR07-like recent strains. Specifically, serum was collected from an age-stratified cohort  
646 (ages 18 - 32 or 60+) vaccinated during the 2009-2010 flu season with the monovalent  
647 2009 H1N1 pandemic vaccine (A/California/07/2009) before and 28 days after  
648 vaccination. Antibody levels were measured against recombinant HA proteins derived

649 from historical antigens via ELISA. We report the relative change in antibody (d28/d0) in  
650 order to account for age-specific differences in basal antibody cross-reactivity.

651 The similarity and differences in the responses of each group was assessed first.  
652 Although the sample size for the two groups was limited ( $n = 8$  and  $n = 9$ ), the 18-32  
653 group clustered separately from the 60+ group by hierarchical clustering although this  
654 grouping was not exact (Fig 6A). Consistent with our model's findings, cross-reactivity  
655 was generally increased in the BR07 representative group except for FM47, NC99, and  
656 BR07 in which both groups had similar levels (Fig 6B). Stalk specific antibody  
657 responses were measured using chimeric HA proteins that contained an "exotic" HA  
658 head but retained the conserved stalk region (cH9.1 and cH6.1, Fig 6B). The BR07  
659 group had an increased response to the stalk region compared to the SC18 group for  
660 both chimeras, although this was more pronounced in the cH9.1 assay. These findings  
661 were consistent with the increase in stalk-specific antibody in the BR07 primed group  
662 compared to the SC18 primed group in the model. Although our validation cohort was  
663 underpowered, and differences did not reach statistical significance (with the exception  
664 of NC99, t-test  $p=0.049$ ), we found that the qualitative trends of the data match closely  
665 with that of the model. This suggests that the model can at least qualitatively predict  
666 differences in the cross-reactivity and relative stalk-specific antibody of secondary  
667 immune responses.

668

### 669 **Fig 6 Serum Antibody Levels for Age-Stratified Cohort**

670 (A) Hierarchical clustering of antibody binding measured against recombinant HA  
671 proteins using ELISA. (B) Heatmap of ELISA antibody binding data. Data represents the

672 relative change in binding. Data was log transformed and standardized, values represent  
673 column z-scores.

## 674 **Discussion**

675 In the current study, we aimed to understanding theoretically how prior exposure  
676 to influenza virus antigens affects the antigenic site specificity of the antibodies elicited  
677 by vaccination. This work was an extension of the work originally performed by Smith et  
678 al.[37] and the theory of Shape Space originally developed by Perelson et al.[15].  
679 Consist with Smith et al. findings, we found that the antigenic relationship between the  
680 first and secondary exposure antigens largely affect the specificity of the antibody  
681 response. Moreover, during secondary immune responses in the model, antigen was  
682 removed from the system more quickly in the group previously exposed to an  
683 antigenically similar strain during the primary exposure, consistent with the notion of  
684 antibody mediated negative interference[17]. Additionally, the increased antibody  
685 response to the CA09 strain in the SC18 exposed group after boosting supports the  
686 notion of positive interference, in which antibody responses from preexisting memory B  
687 cells are increased. Taken together, our findings support the Antigenic Distance  
688 Hypothesis described by Smith et al.[17] .

689 The expansion of the Shape Space based model to include multiple antigenic  
690 sites by Chaudhury et al. was a major advancement in use of the model to understand  
691 B cell specificity across complex antigens[38]. By incorporating multiple antigenic sites,  
692 the model creates competition for antigen between B cells complementary to different  
693 antigenic sites on the same antigen. Although Chaudhury et al. modeled a multivalent  
694 vaccine, our findings are consistent with their finding that antibody responses to a  
695 normally subdominant antigenic site will dominate when the antigenic distance between

696 head antigens are large. Additionally, the large increase in stalk-specific antibodies in  
697 the BR07 group is consistent with reports on universal vaccine development that apply  
698 a similar strategy to boost stalk specific antibodies[39,40].

699 One of the most significant findings of the 2009 pandemic, was the ability of 2009  
700 pandemic vaccine to induce antibodies able to bind antigenically distinct viruses[7,12].  
701 Our model agrees with these findings demonstrating that BR07 primed individuals will  
702 have an increased antibody reactivity to 1918-like viruses (CA09, SC18, NJ76) as well  
703 as seasonal H1N1 viruses, while SC18 primed individuals will only cross-react to  
704 viruses antigenically close to CA09. These findings are consistent with the reports  
705 suggesting that original virus exposures, not age, affected the vaccine response to the  
706 2009 vaccine[41,42]. Furthermore, although only slightly different, SC18 antibody titers  
707 were higher than CA09 titers after boosting with CA09 in the SC18 group but CA09  
708 titers were higher than BR07 in the BR07 primed group, consistent with the  
709 phenomenon known as original antigenic sin[43,44].

710 Other reports of the immune responses to the 2009 pandemic vaccine can be  
711 used to further validate our model. Pre-boost titers of the SC18 primed group were  
712 almost 3-fold greater for CA09 than those primed for BR07, similar to what has been  
713 reported[45]. Additionally, the fold-change in antibody response to the stalk is consistent  
714 with published reports[13]. The Sa antigenic site dominance in the SC18 group is  
715 consistent with experimental data showing that antibody responses from the 60+ year  
716 old individuals had antibody responses focused on the Sa site of CA09[46]. Furthermore  
717 fold change titers (pre-boost/post-boost) were decreased in the SC18 primed group



718 suggesting it is important to take into account priming history of the elderly when trying  
719 to assess immunosenescence or predict responses in different age groups[17,47-49].

720 Boosting the cross-reactivity of the antibody response (i.e. the number of strains  
721 an immune system has antibodies against) is crucial to the design of universal vaccines.  
722 Here we demonstrate that cross-reactivity of secondary immune responses is  
723 dependent on priming antigen and therefore different strategies may be required for  
724 individuals with different exposure histories. This was clearly demonstrated in the  
725 context of pandemic vaccines where more highly cross-reactive antibodies were  
726 observed in subjects primed with an A/Hong Kong/97 H5 vaccine and later boosted with  
727 an A/Vietnam/04 vaccine, who then subsequently mounted antibody responses  
728 recognizing both vaccine strains, as well as a third H5 strain (A/Indonesia/05) not  
729 included in either vaccination [50]. This suggests strategies to broaden cross-reactive  
730 immunity may be possible with existing vaccine technologies. Although the model does  
731 not directly examine susceptibility to infection, it does demonstrate how antigenic  
732 distance between heterologous antigenic sites can shift responses to particular  
733 conserved antigenic sites leading to increases in cross-reactivity and thus immunity to a  
734 greater number of variant influenza stains. Hence, incorporation of a model, such as the  
735 one presented here, into the vaccination selection process may allow targeting of  
736 vaccine strains specific to the individual in order to produce broadly reactive responses  
737 in individuals with different exposure histories.

738 Lastly, the work described here demonstrates the limitations with the current  
739 vaccine selection process that relies only on antigenic and phylogenetic distances  
740 between strains. Here, the shorter antigenic distance between SC18 and CA09

741 compared to BR07 and CA09 led to two different immune system states. For instance,  
742 the SC18 primed group had low titers to US77 after boost with CA09, while the BR07  
743 primed group had greater titers. Therefore, although the antigenic distance between  
744 CA09 and US77 is fixed, and reflects expected responses from naïve individuals,  
745 previously exposed individuals produce antibody responses inconsistent with antigenic  
746 distance estimates. Therefore, this suggests that serum samples are not ‘impartial  
747 observers’ of antigenic similarity and they are highly biased by their own immune  
748 histories. This is an inherent challenge with the current vaccine approach and highlights  
749 the need to take into account prior exposure histories when trying to predict antibody  
750 specificities after vaccination.

751

## 752 Acknowledgments

753 We thank the Center for Integrated Research Computing and the Health  
754 Sciences Center for Computational Innovation for computational assistance and  
755 resources. Thank you Carrie A. Anderson and Elaine Smolock for help with the  
756 manuscript. Thank you Alan Perelson, Martin Zand, Juilee, Thakar, John Treanor, Jim  
757 Miller, and Paige Lawrence for supervision of this work. Thank you Derek Smith for  
758 helpful comments early on in this project. Thank you Anthony DiPiazza, Matt Brewer,  
759 and Patrick McCall for discussions on the project. Funding for this work was supported  
760 by the New York Influenza Center of Excellence NIH/NIAID/DMID,  
761 HHSN272201400005C.

## 762 REFERENCES

- 763 1. Anderson CS, Ortega S, Chaves FA, Clark AM, Yang H, Topham DJ, et al.  
764 Natural and directed antigenic drift of the H1 influenza virus hemagglutinin stalk  
765 domain. Sci Rep. Nature Publishing Group; 2017;7: 14614. doi:10.1038/s41598-

- 766 017-14931-7
- 767 2. WILEY DC, SKEHEL JJ. The Structure and Function of the Hemagglutinin  
768 Membrane Glycoprotein of Influenza-Virus. Annual Review of Biochemistry.  
769 1987;56: 365–394. doi:10.1146/annurev.biochem.56.1.365
- 770 3. Henry Dunand CJ, Leon PE, Kaur K, Tan GS, Zheng N-Y, Andrews S, et al.  
771 Preexisting human antibodies neutralize recently emerged H7N9 influenza  
772 strains. J Clin Invest. 2015;125: 1255–1268. doi:10.1172/JCI74374
- 773 4. Jegaskanda S, Laurie KL, Amarasena TH, Winnall WR, Kramski M, De Rose R,  
774 et al. Age-associated cross-reactive antibody-dependent cellular cytotoxicity  
775 toward 2009 pandemic influenza A virus subtype H1N1. J Infect Dis. Oxford  
776 University Press; 2013;208: 1051–1061. doi:10.1093/infdis/jit294
- 777 5. Henry Dunand CJ, Leon PE, Huang M, Choi A, Chromikova V, Ho IY, et al. Both  
778 Neutralizing and Non-Neutralizing Human H7N9 Influenza Vaccine-Induced  
779 Monoclonal Antibodies Confer Protection. Cell Host and Microbe. 2016;19: 800–  
780 813. doi:10.1016/j.chom.2016.05.014
- 781 6. Caton AJ, Brownlee GG, Yewdell JW, Gerhard W. The antigenic structure of the  
782 influenza virus A/PR/8/34 hemagglutinin (H1 subtype). CELL. 1982;31: 417–427.  
783 doi:10.1016/0092-8674(82)90135-0
- 784 7. Li G-M, Chiu C, Wrammert J, McCausland M, Andrews SF, Zheng N-Y, et al.  
785 Pandemic H1N1 influenza vaccine induces a recall response in humans that  
786 favors broadly cross-reactive memory B cells. Proc Natl Acad Sci USA. National  
787 Acad Sciences; 2012;109: 9047–9052. doi:10.1073/pnas.1118979109
- 788 8. Wrammert J, Koutsonanos D, Li G-M, Edupuganti S, Sui J, Morrissey M, et al.  
789 Broadly cross-reactive antibodies dominate the human B cell response against  
790 2009 pandemic H1N1 influenza virus infection. J Exp Med. 2011;208: 181–193.  
791 doi:10.1084/jem.20101352
- 792 9. Joyce MG, Wheatley AK, Thomas PV, Chuang G-Y, Soto C, Bailer RT, et al.  
793 Vaccine-Induced Antibodies that Neutralize Group 1 and Group 2 Influenza A  
794 Viruses. CELL. 2016;166: 609–623. doi:10.1016/j.cell.2016.06.043
- 795 10. Crotty S, Felgner P, Davies H, Glidewell J, Villarreal L, Ahmed R. Cutting Edge:  
796 Long-Term B Cell Memory in Humans after Smallpox Vaccination. The Journal of  
797 Immunology. 2003;171: 4969–4973. doi:10.4049/jimmunol.171.10.4969
- 798 11. Kurosaki T, Kometani K, Ise W. Memory B cells. Nature Reviews Immunology.  
799 2015;15: 149–159. doi:10.1038/nri3802
- 800 12. Wrammert J, Koutsonanos D, Li GM, Edupuganti S, Sui J, Morrissey M, et al.  
801 Broadly cross-reactive antibodies dominate the human B cell response against  
802 2009 pandemic H1N1 influenza virus infection. Journal of Experimental Medicine.

- 803 2011;208: 181–193. doi:10.1084/jem.20101352
- 804 13. Sangster MY, Baer J, Santiago FW, Fitzgerald T, Ilyushina NA, Sundararajan A,  
805 et al. B Cell Response and Hemagglutinin Stalk-Reactive Antibody Production in  
806 Different Age Cohorts following 2009 H1N1 Influenza Virus Vaccination. *Clinical*  
807 *and Vaccine Immunology*. 2013;20: 867–876. doi:10.1128/CVI.00735-12
- 808 14. Garten RJ, Davis CT, Russell CA, Shu B, Lindstrom S, Balish A, et al. Antigenic  
809 and Genetic Characteristics of Swine-Origin 2009 A(H1N1) Influenza Viruses  
810 Circulating in Humans. *Science*. American Association for the Advancement of  
811 *Science*; 2009;325: 197–201. doi:10.1126/science.1176225
- 812 15. Perelson AS, Oster GF. Theoretical studies of clonal selection: Minimal antibody  
813 repertoire size and reliability of self-non-self discrimination. *Journal of Theoretical*  
814 *Biology*. 1979;81: 645–670. doi:10.1016/0022-5193(79)90275-3
- 815 16. Smith DJ, Forrest S, Hightower RR, Perelson AS. Deriving shape space  
816 parameters from immunological data. *Journal of Theoretical Biology*. 1997;189:  
817 141–150. doi:10.1006/jtbi.1997.0495
- 818 17. Smith DJ, Forrest S, Ackley DH, Perelson AS. Variable efficacy of repeated  
819 annual influenza vaccination. *Proceedings of the National Academy of Sciences*.  
820 1999;96: 14001–14006.
- 821 18. Chaudhury S, Reifman J, Wallqvist A. Simulation of B cell affinity maturation  
822 explains enhanced antibody cross-reactivity induced by the polyvalent malaria  
823 vaccine AMA1. *J Immunol*. American Association of Immunologists; 2014;193:  
824 2073–2086. doi:10.4049/jimmunol.1401054
- 825 19. Anderson CS, McCall PR, Stern HA, Yang H, Topham DJ. Antigenic cartography  
826 of H1N1 influenza viruses using sequence-based antigenic distance calculation.  
827 *BMC Bioinformatics*. BioMed Central; 2018;19: 51. doi:10.1186/s12859-018-2042-  
828 4
- 829 20. Caton AJ, Brownlee GG, Yewdell JW, Gerhard W. The antigenic structure of the  
830 influenza virus A/PR/8/34 hemagglutinin (H1 subtype). *CELL*. 1982;31: 417–427.  
831 doi:10.1016/0092-8674(82)90135-0
- 832 21. Edelman GM. Origins and mechanisms of specificity in clonal selection. *Soc Gen*  
833 *Physiol Ser*. 1974;29: 1–38.
- 834 22. NOSSAL GJV, ADA GL. ANTIGENS AND THE AFFERENT LIMB OF THE  
835 IMMUNE RESPONSE. *Antigens, Lymphoid Cells and the Immune Response*.  
836 Elsevier; 1971. pp. 5–23. doi:10.1016/b978-0-12-521950-1.50009-1
- 837 23. JERNE NK. Clonal selection in a lymphocyte network. *Soc Gen Physiol Ser*.  
838 1974;29: 39–48.

- 839 24. Kohler G. Frequency of precursor cells against the enzyme beta-galactosidase:  
840 an estimate of the BALB/c strain antibody repertoire. *Eur J Immunol*. WILEY-VCH  
841 Verlag GmbH; 1976;6: 340–347. doi:10.1002/eji.1830060507
- 842 25. Cunningham AJ. The generation of antibody diversity: a new look. 1976.
- 843 26. Clark AM, DeDiego ML, Anderson CS, Wang J, Yang H, Nogales A, et al.  
844 Antigenicity of the 2015-2016 seasonal H1N1 human influenza virus HA and NA  
845 proteins. *PLoS ONE*. 2017;12: e0188267. doi:10.1371/journal.pone.0188267
- 846 27. Gillespie DT. A general method for numerically simulating the stochastic time  
847 evolution of coupled chemical reactions. *Journal of Computational Physics*.  
848 1976;22: 403–434. doi:10.1016/0021-9991(76)90041-3
- 849 28. Gillespie DT. Exact stochastic simulation of coupled chemical reactions. *The*  
850 *Journal of Physical Chemistry*. 1977;81: 2340–2361. doi:10.1021/j100540a008
- 851 29. Woo HJ, Reifman J. A quantitative quasispecies theory-based model of virus  
852 escape mutation under immune selection. ... of the National Academy of  
853 Sciences. 2012. doi:10.1073/pnas.1117201109/-/DCSupplemental
- 854 30. Eggink D, Goff PH, Palese P. Guiding the Immune Response against Influenza  
855 Virus Hemagglutinin toward the Conserved Stalk Domain by Hyperglycosylation  
856 of the Globular Head Domain. *J Virol*. 2013;88: 699–704. doi:10.1128/JVI.02608-  
857 13
- 858 31. Ellebedy AH, Krammer F, Li GM, Miller MS, Chiu C, Wrammert J, et al. Induction  
859 of broadly cross-reactive antibody responses to the influenza HA stem region  
860 following H5N1 vaccination in humans. *Proceedings of the National Academy of*  
861 *Sciences*. 2014;111: 13133–13138. doi:10.1073/pnas.1414070111
- 862 32. Ellebedy AH, Krammer F, Li G-M, Miller MS, Chiu C, Wrammert J, et al. Induction  
863 of broadly cross-reactive antibody responses to the influenza HA stem region  
864 following H5N1 vaccination in humans. *Proc Natl Acad Sci USA*. 2014;111:  
865 13133–13138. doi:10.1073/pnas.1414070111
- 866 33. East IJ, Todd PE, Leach SJ. On topographic antigenic determinants in  
867 myoglobins. *Mol Immunol*. 1980;17: 519–525.
- 868 34. Champion AB, Soderberg KL, Wilson AC. Immunological comparison of azurins of  
869 known amino acid sequence. Dependence of cross-reactivity upon sequence  
870 resemblance. *J Mol Evol*. 1975;5: 291–305.
- 871 35. Nachbagauer R, Choi A, Izikson R, Cox MM, Palese P, Krammer F. Age  
872 Dependence and Isotype Specificity of Influenza Virus Hemagglutinin Stalk-  
873 Reactive Antibodies in Humans. *MBio*. American Society for Microbiology; 2016;7:  
874 e01996–15. doi:10.1128/mBio.01996-15

- 875 36. Lee AJ, Das SR, Wang W, Fitzgerald T, Pickett BE, Aevermann BD, et al.  
876 Diversifying Selection Analysis Predicts Antigenic Evolution of 2009 Pandemic  
877 H1N1 Influenza A Virus in Humans. *J Virol.* 2015;89: 5427–5440.  
878 doi:10.1128/JVI.03636-14
- 879 37. Smith DJ. Derek J. Smith Thesis Dissertation. 1997. pp. 1–124.
- 880 38. Chaudhury S, Reifman J, Wallqvist A. Simulation of B Cell Affinity Maturation  
881 Explains Enhanced Antibody Cross-Reactivity Induced by the Polyvalent Malaria  
882 Vaccine AMA1. *The Journal of Immunology.* 2014;193: 2073–2086.  
883 doi:10.4049/jimmunol.1401054
- 884 39. Pica N, Palese P. Toward a Universal Influenza Virus Vaccine: Prospects and  
885 Challenges. *Annu Rev Med.* 2013;64: 189–202. doi:10.1146/annurev-med-  
886 120611-145115
- 887 40. Krammer F, García-Sastre A, Palese P. Is It Possible to Develop a “Universal”  
888 Influenza Virus Vaccine? Toward a Universal Influenza Virus Vaccine: Potential  
889 Target Antigens and Critical Aspects for Vaccine Development. *Cold Spring  
890 Harbor Perspectives in Biology.* 2017. doi:10.1101/cshperspect.a028845
- 891 41. Li Y, Myers JL, Bostick DL, Sullivan CB, Madara J, Linderman SL, et al. Immune  
892 history shapes specificity of pandemic H1N1 influenza antibody responses. *J Exp  
893 Med.* 2013;210: 1493–1500. doi:10.1084/jem.20130212
- 894 42. Andrews SF, Huang Y, Kaur K, Popova LI, Ho IY, Pauli NT, et al. Immune history  
895 profoundly affects broadly protective B cell responses to influenza. *Science  
896 Translational Medicine.* American Association for the Advancement of Science;  
897 2015;7: –316ra192. doi:10.1126/scitranslmed.aad0522
- 898 43. Lessler J, Riley S, Read JM, Wang S, Zhu H, Smith GJD, et al. Evidence for  
899 Antigenic Seniority in Influenza A (H3N2) Antibody Responses in Southern China.  
900 Basler CF, editor. *PLoS Pathog.* 2012;8: e1002802–11.  
901 doi:10.1371/journal.ppat.1002802
- 902 44. Francis T. On the doctrine of original antigenic sin. 1960. doi:10.2307/985534
- 903 45. Hancock K, Veguilla V, Lu X, Zhong W, Butler EN, Sun H, et al. Cross-reactive  
904 antibody responses to the 2009 pandemic H1N1 influenza virus. *N Engl J Med.*  
905 2009;361: 1945–1952. doi:10.1056/NEJMoa0906453
- 906 46. Krause JC, Tumpey TM, Huffman CJ, McGraw PA, Pearce MB, Tsibane T, et al.  
907 Naturally occurring human monoclonal antibodies neutralize both 1918 and 2009  
908 pandemic influenza A (H1N1) viruses. *J Virol.* 2010;84: 3127–3130.  
909 doi:10.1128/JVI.02184-09
- 910 47. Thomas Francis J. On the Doctrine of Original Antigenic Sin. *Proceedings of the  
911 American Philosophical Society.* 2012;; 1–8.

- 912 48. Fonville JM, Wilks SH, James SL, Fox A, Ventresca M, Aban M, et al. Antibody  
913 landscapes after influenza virus infection or vaccination. *Science*. 2014;346: 996–  
914 1000. doi:10.1126/science.1256427
- 915 49. Höpping AM, McElhaney J, Fonville JM, Powers DC, Beyer WEP, Smith DJ. The  
916 confounded effects of age and exposure history in response to influenza  
917 vaccination. *Vaccine*. 2016;34: 540–546. doi:10.1016/j.vaccine.2015.11.058
- 918 50. Goji NA, Nolan C, Hill H, Wolff M, Noah DL, Williams TB, et al. Immune  
919 responses of healthy subjects to a single dose of intramuscular inactivated  
920 influenza A/Vietnam/1203/2004 (H5N1) vaccine after priming with an antigenic  
921 variant. *Journal of Infectious Diseases*. 2008;198: 635–641. doi:10.1086/590916
- 922

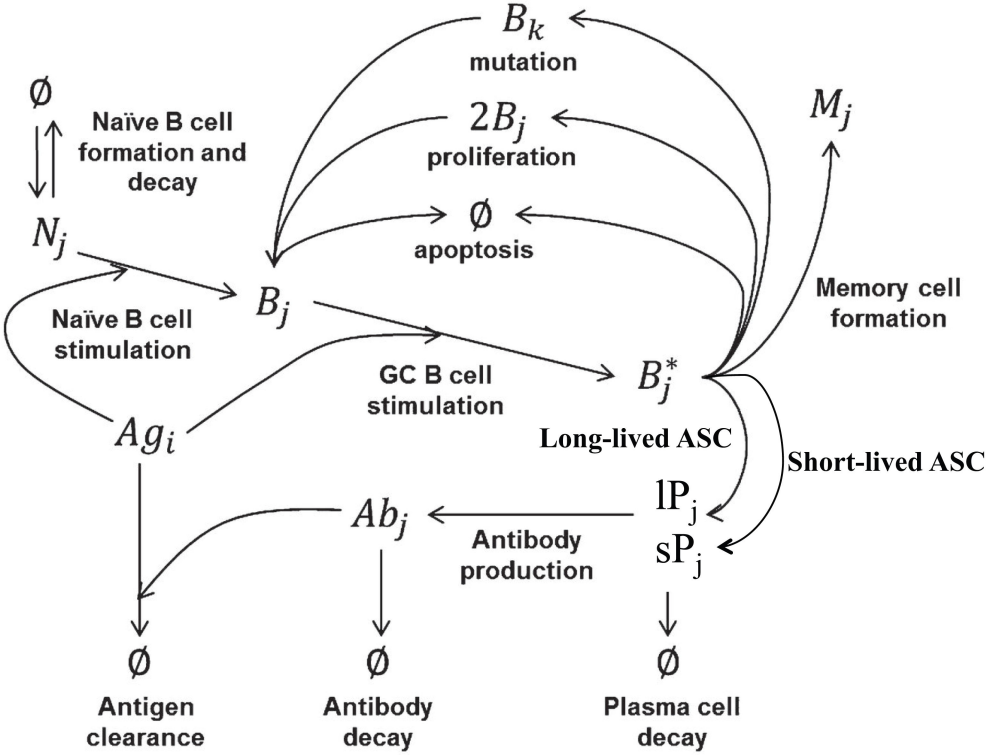



A

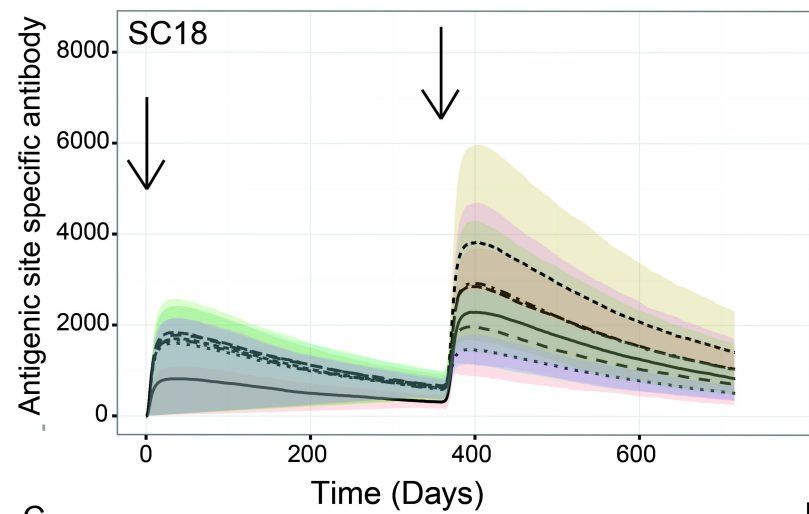

D

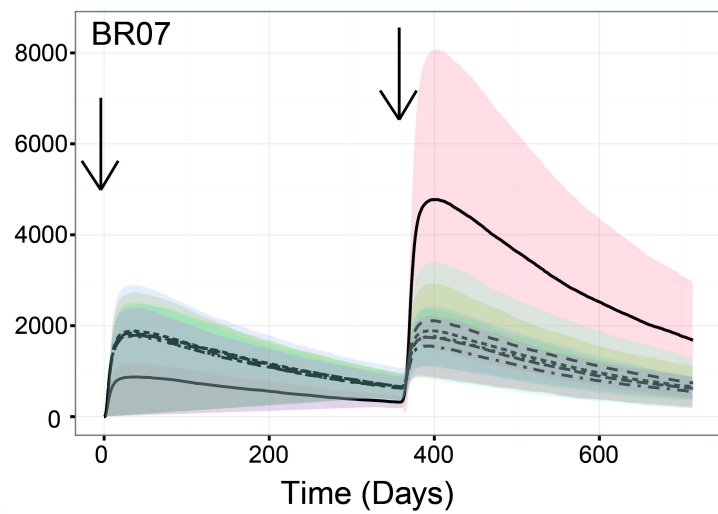

B

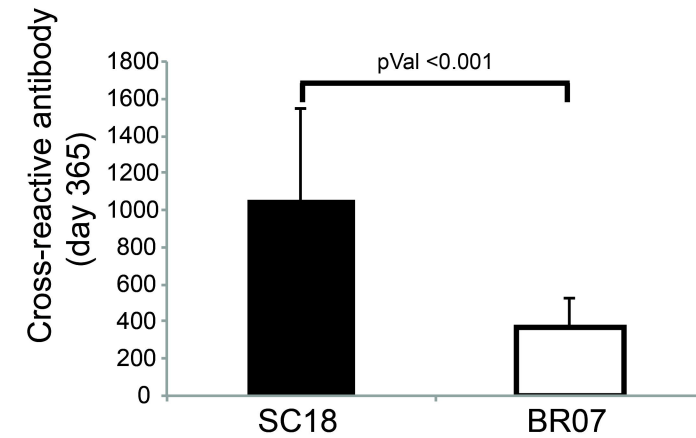

C

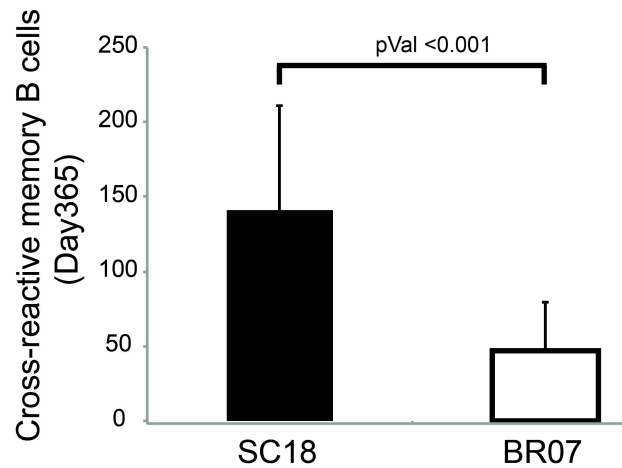

E

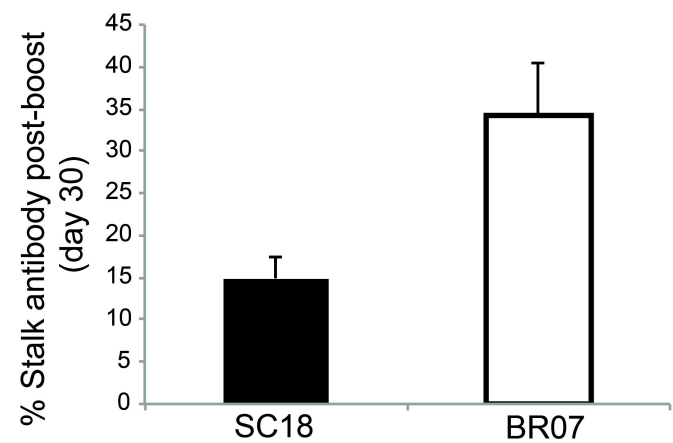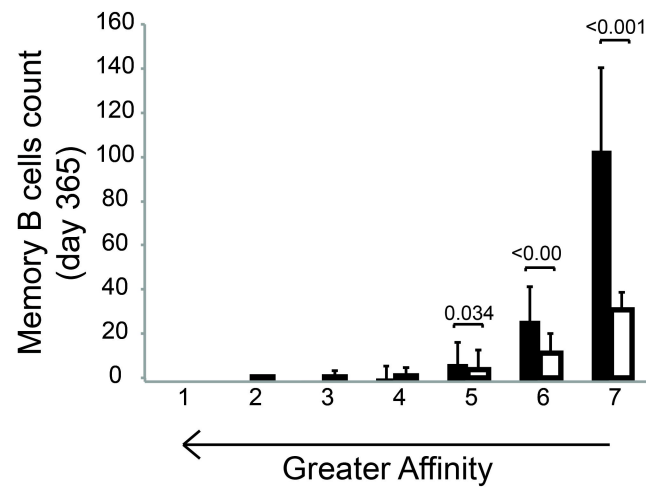

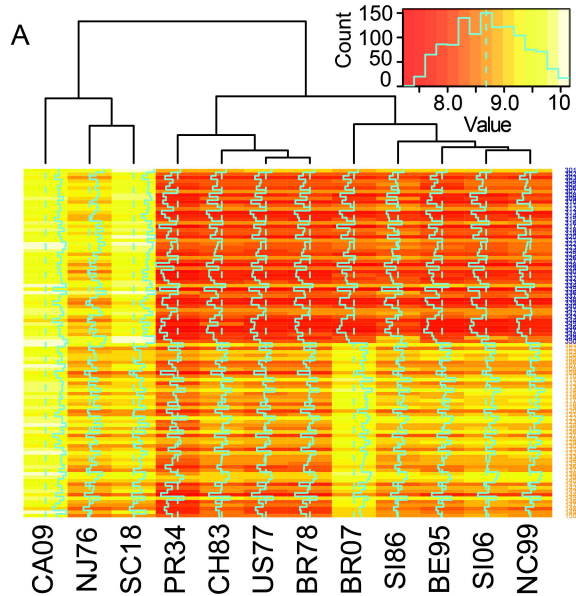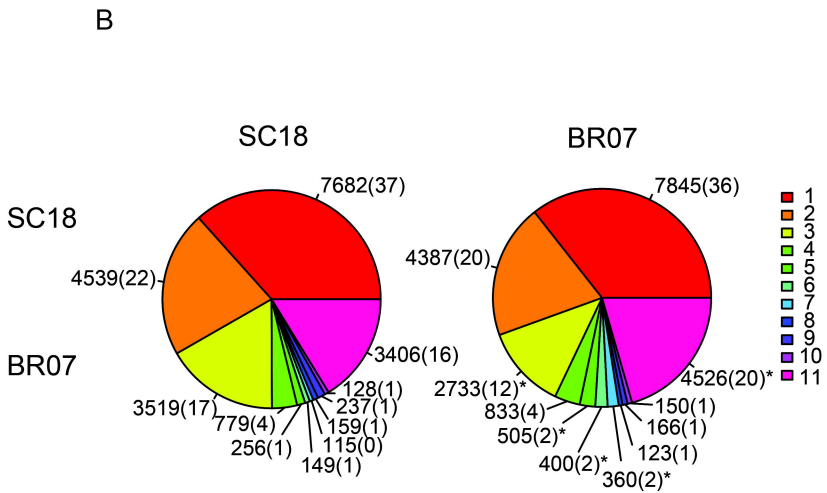

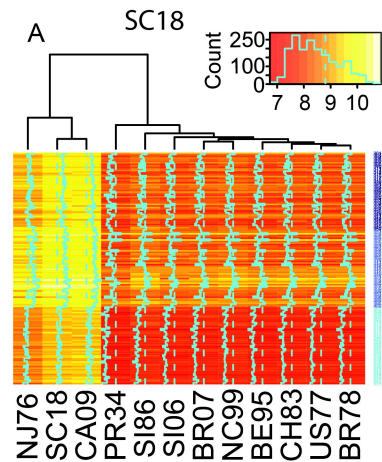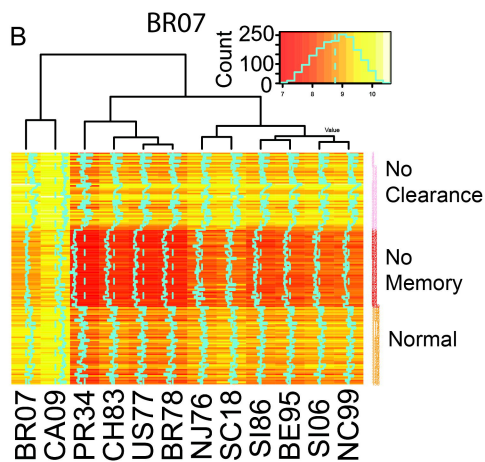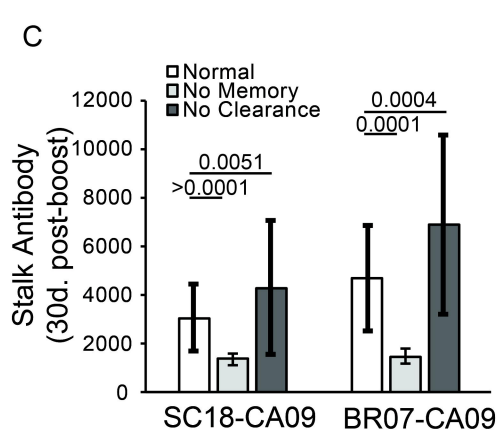

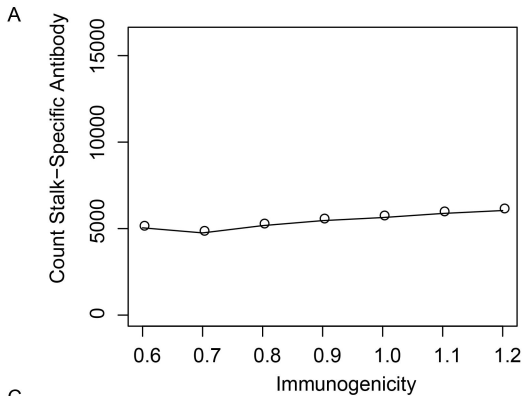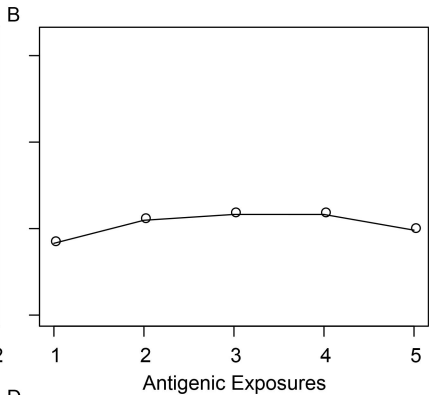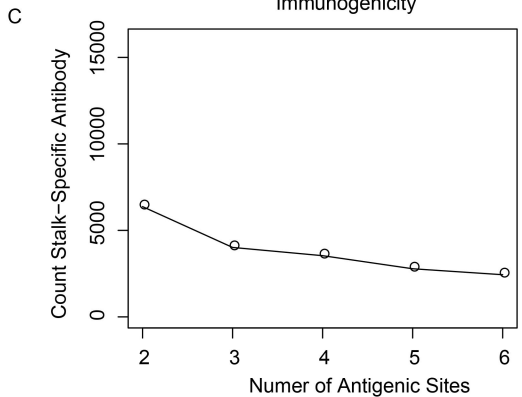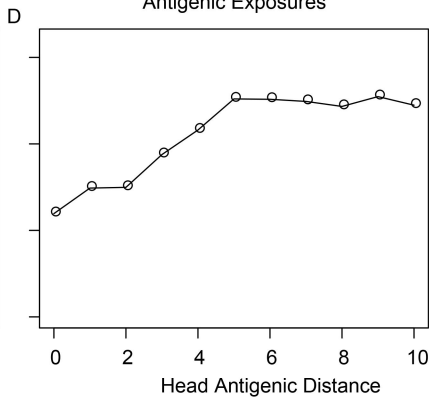

A

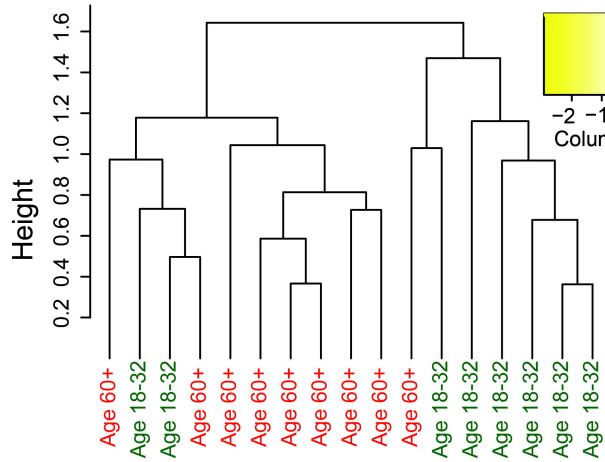

B

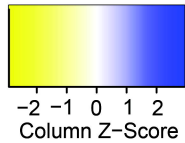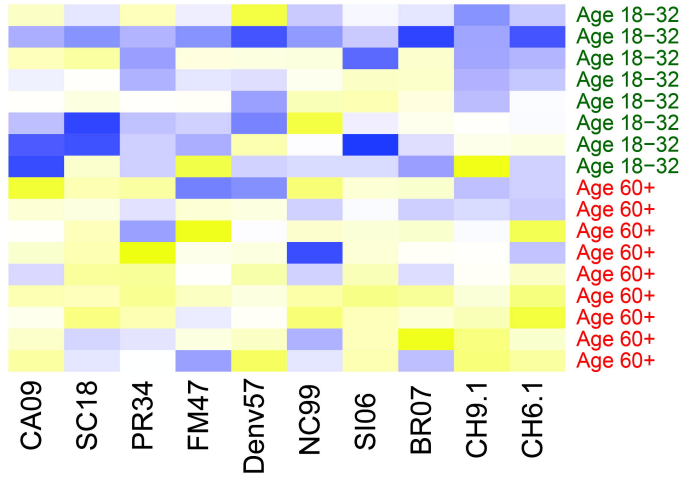

Source: http://biorxiv.org/content/10.1101/346726v1.full.pdf
